# Supplementary material for: Study and optimization of adsorption of sulfur compounds present in fuel
Source: Royal Society of Chemistry journal article supplement (doi:10.1039/c6ra16367j), 2016-01-01
Supplement: c6ra16367j1.pdf [file c6ra16367j1.pdf]

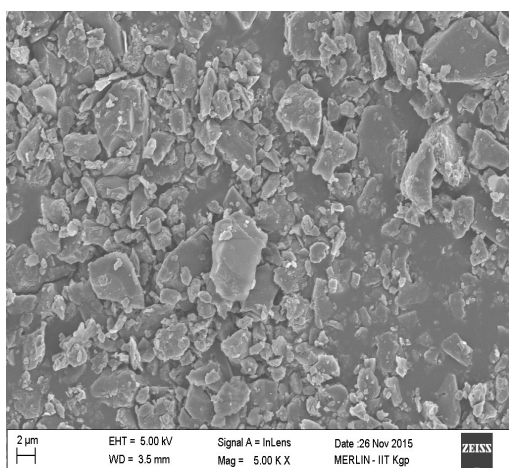

A

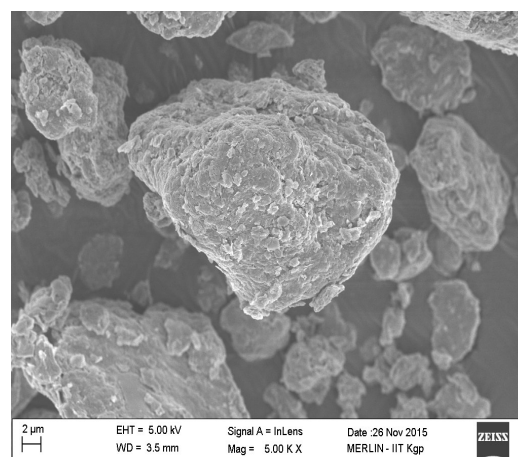

B

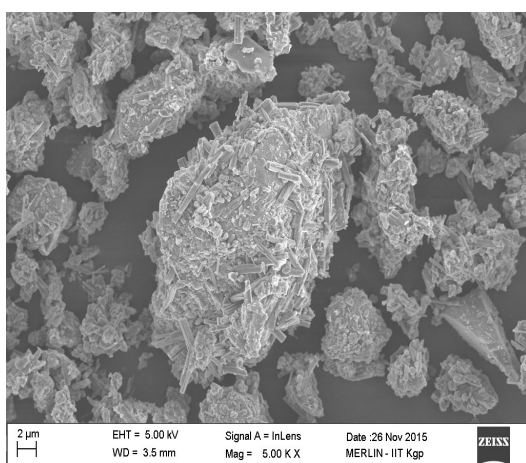

C

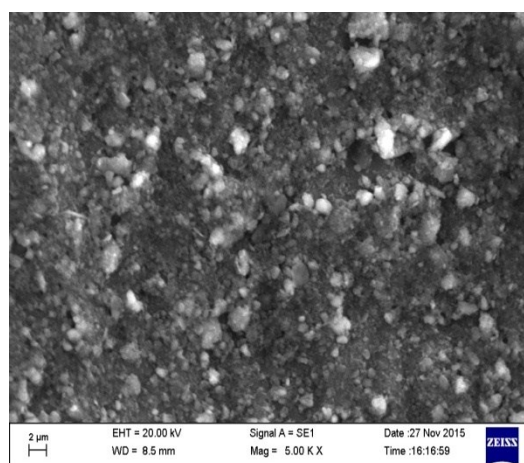

D

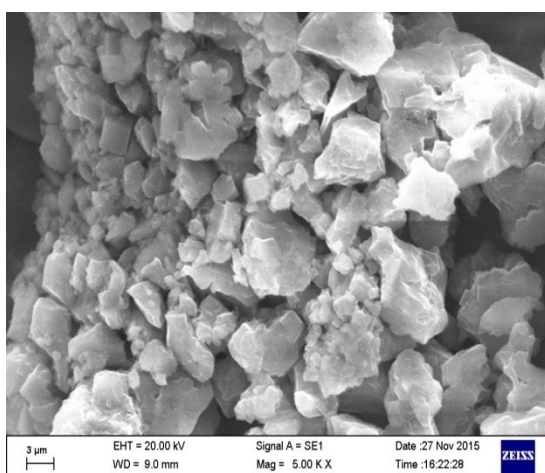

E

**Figure : SEM image of all adsorbent (A)Coal dust, (B)Bentonite, (C)Fly ash, (D)Laterite soil and (E)Sodium zeolite**

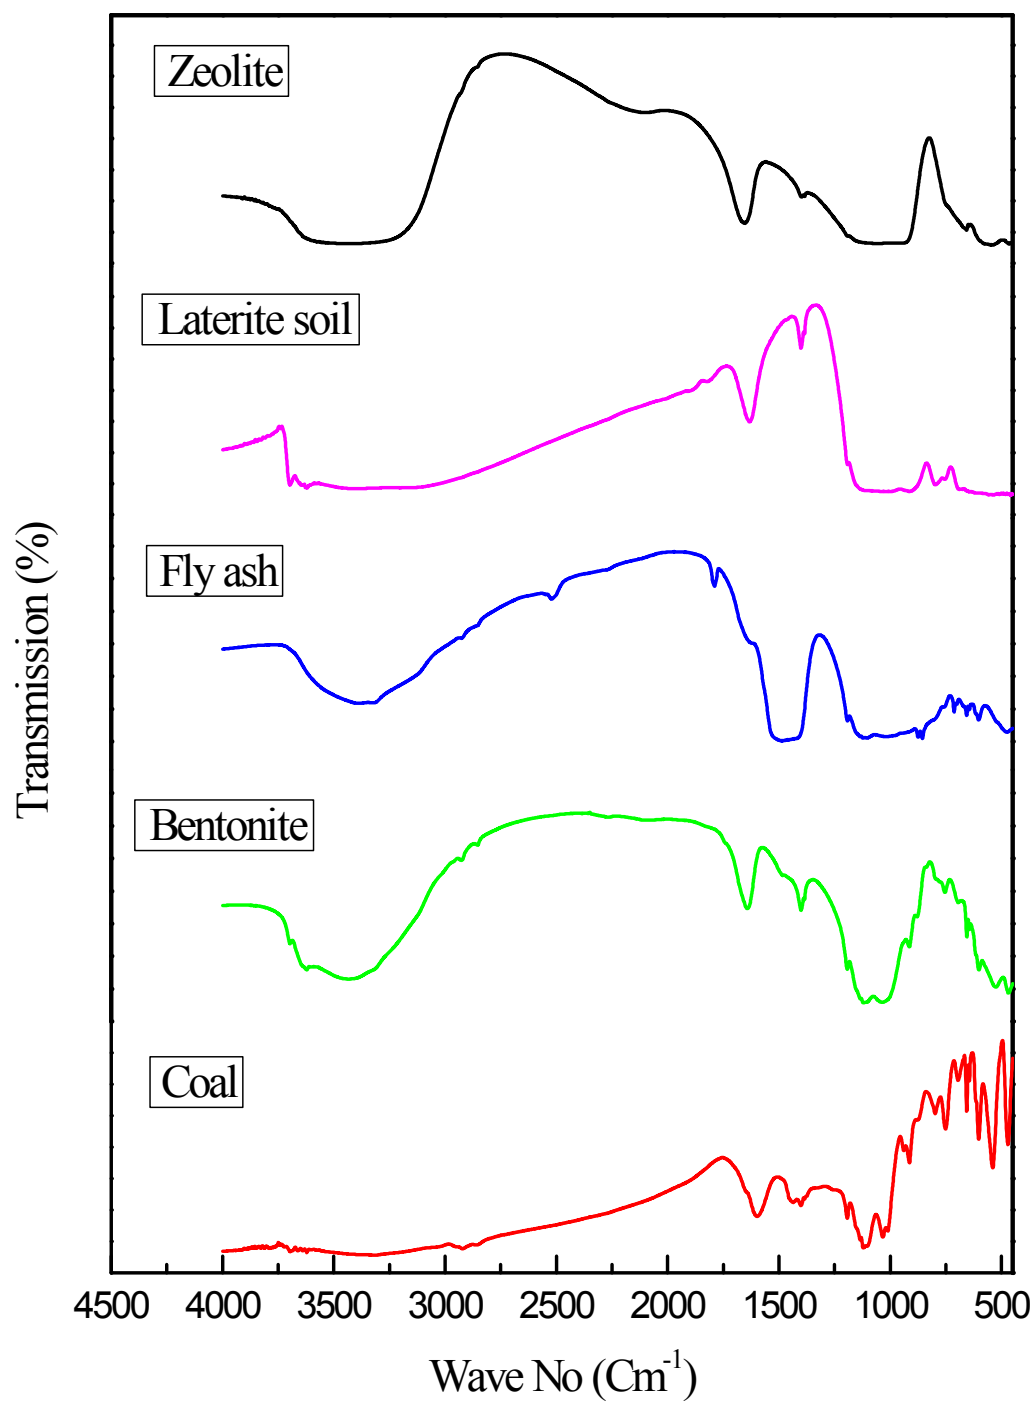

**Figure : FTIR peak of all adsorbent**

## FTIR analysis of adsorbents

Figure showed the FTIR spectra of coal dust, bentonite, fly ash, laterite and zeolite respectively in the wave no range of 4000-450  $\text{cm}^{-1}$ . In coal dust the peaks above 3500  $\text{cm}^{-1}$  showed the heterocyclic N-H stretching and in the range of 3300 – 2500 showed the O-H stretching of carboxyl group. The C-H stretching band of aromatic was shown in range of 3100 – 3000  $\text{cm}^{-1}$ . The peaks at 2920 and 2850  $\text{cm}^{-1}$  may be due to the presence of aliphatic groups. The peaks in the range of 1700 to 1660  $\text{cm}^{-1}$  showed the presence of carbonyl and carboxyl groups where 1600  $\text{cm}^{-1}$  corresponds the presence of aromatic C=C structure. The -CH<sub>3</sub> group was observed at 1398  $\text{cm}^{-1}$  and 670  $\text{cm}^{-1}$  is assigned to C-S band. The peaks in the range of 900 to 700  $\text{cm}^{-1}$  indicate the presence of C-H aromatic out of plane bending modes [1-3]. In bentonite peaks showed in the range of 1300 to 450  $\text{cm}^{-1}$ , represent the Si-O stretching where 466, 524, 628, 670, 686, 848, 878, 915  $\text{cm}^{-1}$  were attributed to Si-O-Si, Al-O-Si, Si-O-Al, Si-O-Mg, Quartz, Al-OH-Mg, Al-Fe-OH and Al-OH-Al bending. The peaks at 1645 and 3466  $\text{cm}^{-1}$  were assigned for OH group of water molecules. The inner hydroxyl groups between the tetrahedral and octahedral groups were present near 3620  $\text{cm}^{-1}$ [4,5]. In flyash the peak at 3600  $\text{cm}^{-1}$  assigned for OH group of the Si-OH and water molecules. The peaks in the range of 2400-3400  $\text{cm}^{-1}$  corresponds the presence of hydrogen bonded O-H stretching of acidic groups. A broad band ranging from 1170 -1070  $\text{cm}^{-1}$  showed the asymmetric stretching of Si-O-Si where 1160  $\text{cm}^{-1}$  was attributed to the SO<sub>4</sub><sup>2-</sup> ions. The peaks at 1103 and 656  $\text{cm}^{-1}$  were assigned to the Si-O and Al-O vibration bands [6-9]. In laterite soil the peak at 3680  $\text{cm}^{-1}$  was attributed to Al-O-H stretching. The OH group of the Fe, Al and Si were assigned in the range of 3405-3370  $\text{cm}^{-1}$ . The peak near 1620  $\text{cm}^{-1}$  showed the H-O-H group of water molecules. The absorption band near 1030  $\text{cm}^{-1}$  corresponds to the presence of Si-O stretching. At 912  $\text{cm}^{-1}$ , the absorption band showed Al-OH bond stretching. The band near 790  $\text{cm}^{-1}$  was attributed to cristobalite. The peaks ranges from 542 to 474 were assigned due to Fe-O bond stretching and Si-O-Al stretching [10]. In zeolite the peaks ranges from 3700 to 3350  $\text{cm}^{-1}$  were assigned to Si-OH, Si-OH-Al and OH group. The absorption bands ranges from 1200 to 450  $\text{cm}^{-1}$  showed the vibration of Si-O-Al, Si-O-Si, Si-O and Si-Al species and the peak at 668  $\text{cm}^{-1}$  was assigned to the Si-O-M functional group with Misthe exchangeable Na<sup>+</sup> ion metal species [11].

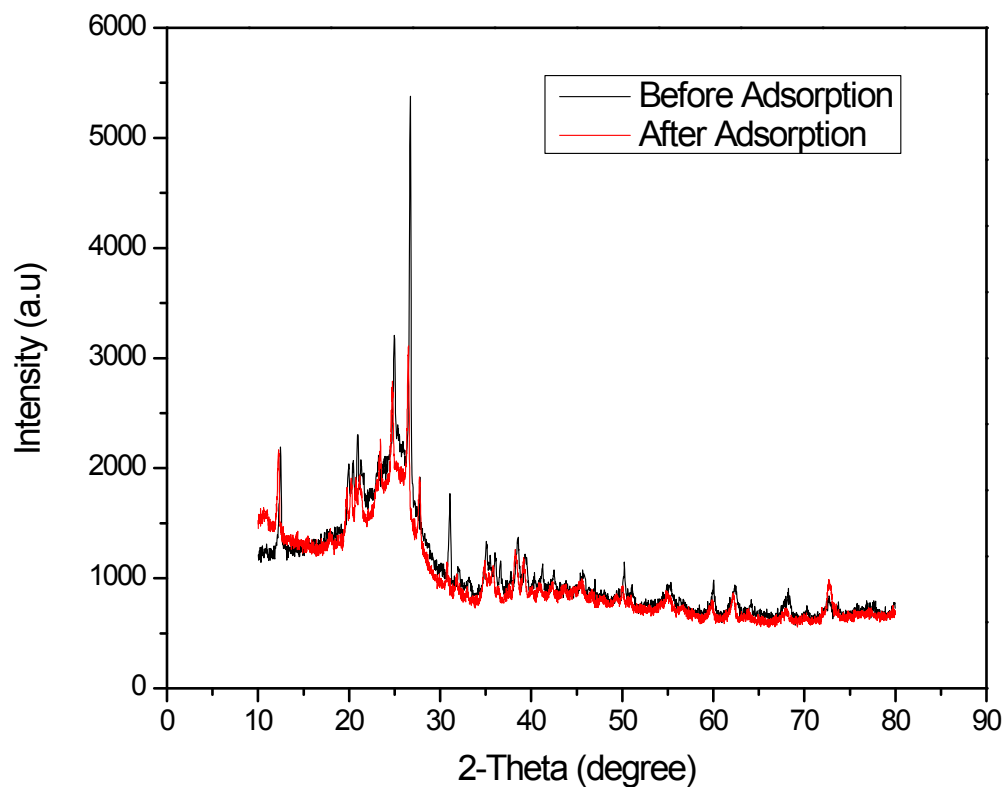

**Figure: XRD of Coal sample before and after adsorption**

The above figure shows the XRD plot of the coal dust sample (before and after adsorption). From the figure, it is evident that no significant changes in the XRD main peaks of the coal sample ( $12.469^\circ$ ,  $26.740^\circ$ ,  $31.052^\circ$  and  $50.237^\circ$ ) occurred after adsorption, although a little decrease in intensity of the main peaks is observed. This lesser intensity of the main peaks may be due to the adsorption of S compounds on the upper surface of the adsorbent [12], but the absence of any new peak after adsorption proves that the process is physical adsorption not the chemical one [13].

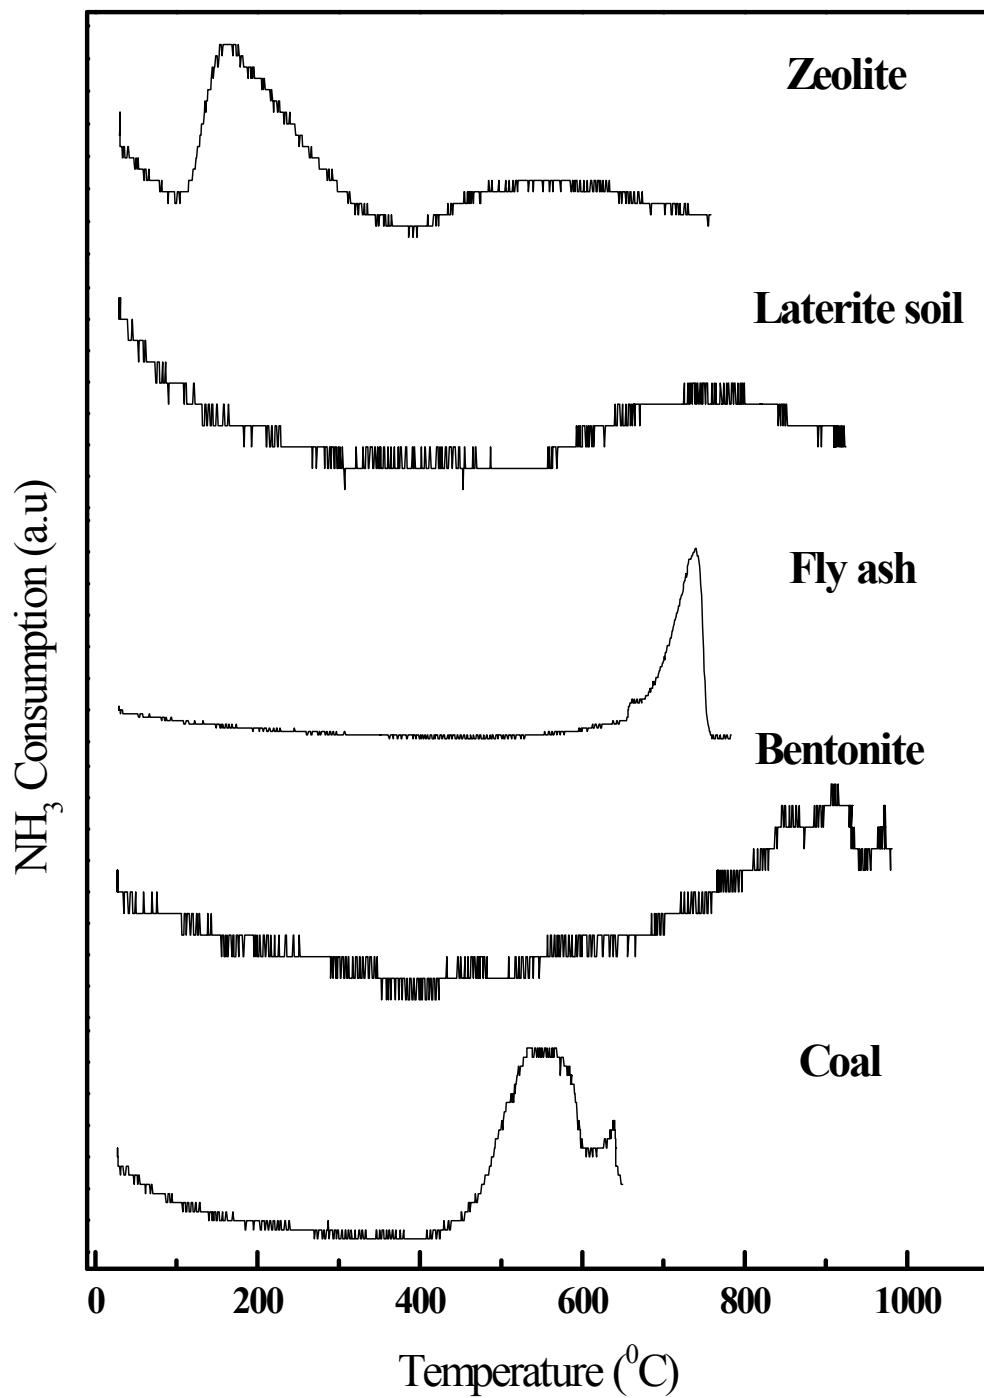

Figure :  $\text{NH}_3$ -TPD curve of adsorbents

**Table : NH<sub>3</sub>-TPD acidity analysis of adsorbents**

---

| Adsorbent     | Acidity (mmol/g) |
|---------------|------------------|
| Coal dust     | 8.22             |
| Bentonite     | 5.64             |
| Fly ash       | 10.65            |
| Laterite soil | 0.02             |
| Zeolite       | 2.76             |

---

**Table : Proximate analysis of coal**

---

| Moisture Content | Ash Content | Volatile Matter | Fixed Carbon |
|------------------|-------------|-----------------|--------------|
| 1.36%            | 17.4%       | 25%             | 56.24%       |

---

**Table : Ultimate analysis of coal**

---

| Carbon | Hydrogen | Sulfur | Nitrogen |
|--------|----------|--------|----------|
| 79.13% | 2.23%    | 1.3%   | 1.13%    |

---

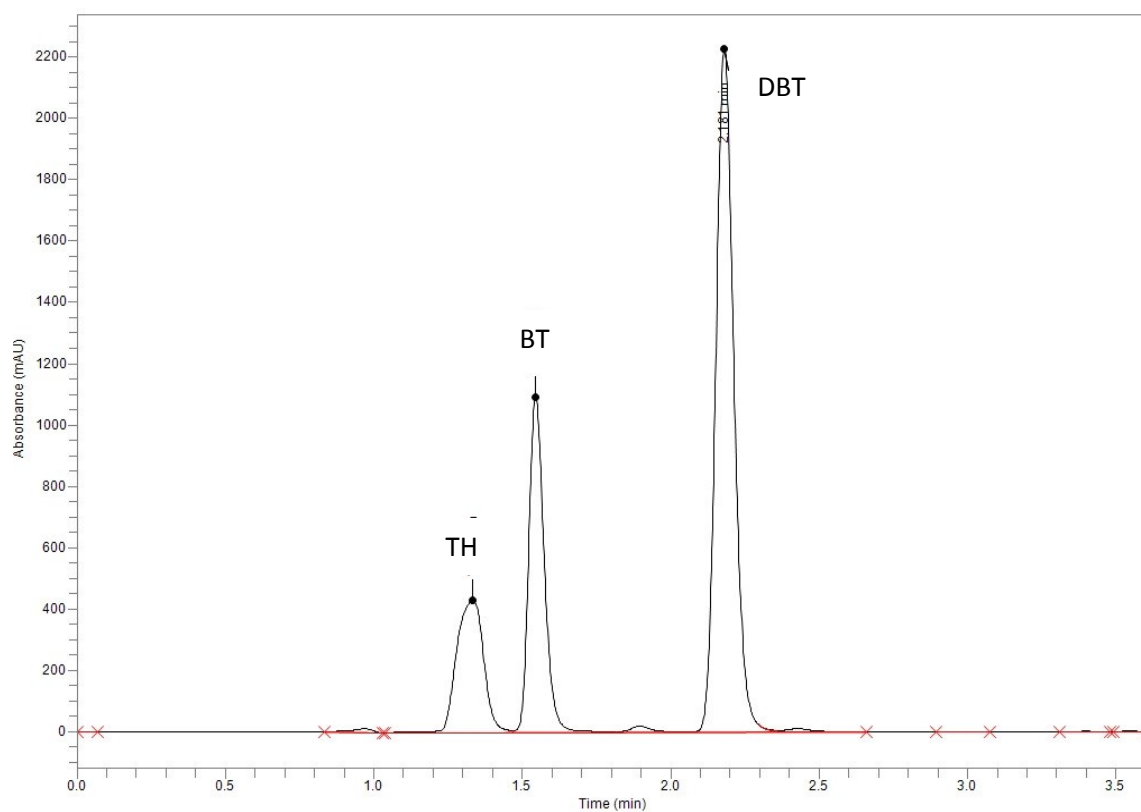

**Figure : HPLC of feed sample (MF-4)**

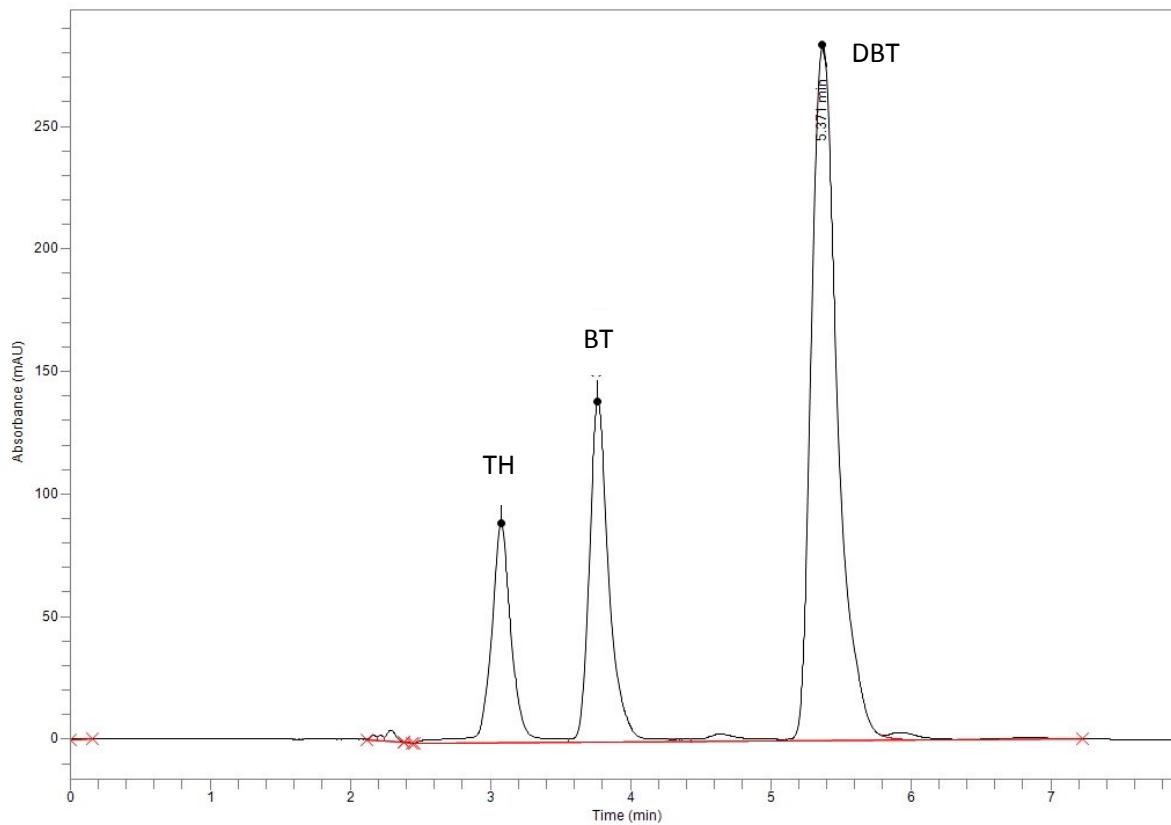

**Figure : HPLC of model fuel after adsorption by coal**



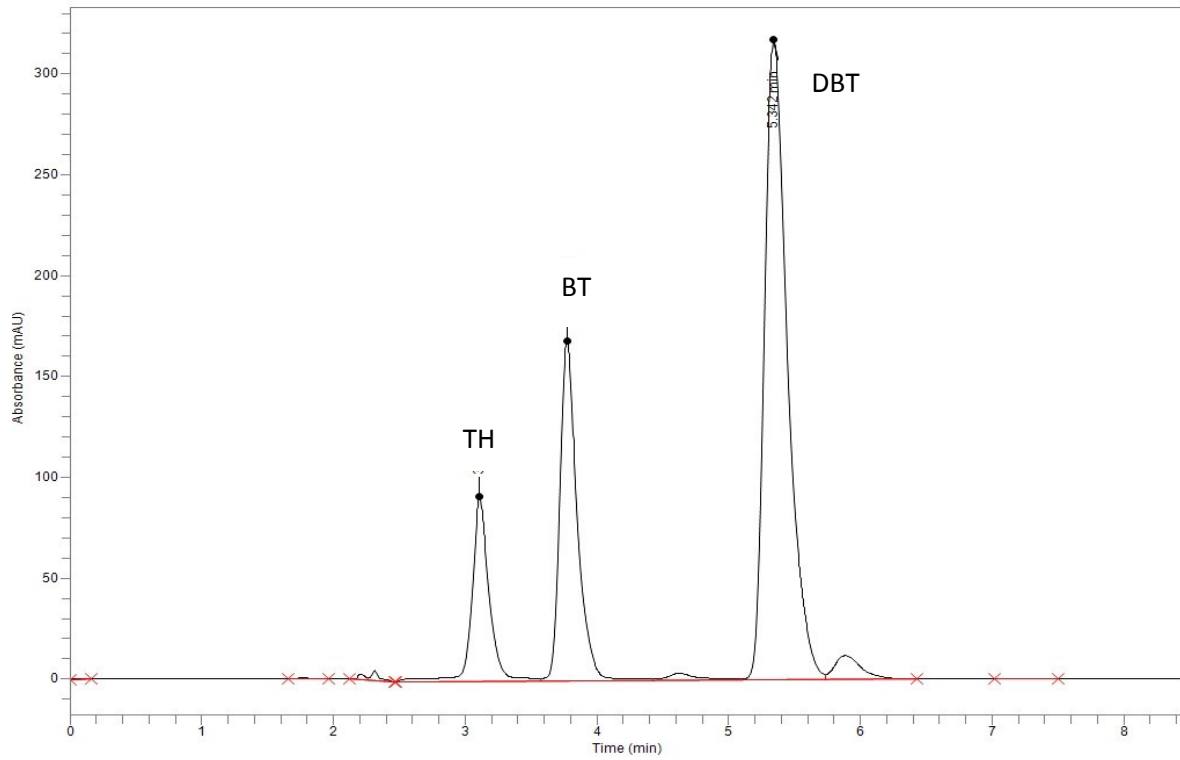

**Figure : HPLC of model fuel after adsorption by bentonite**

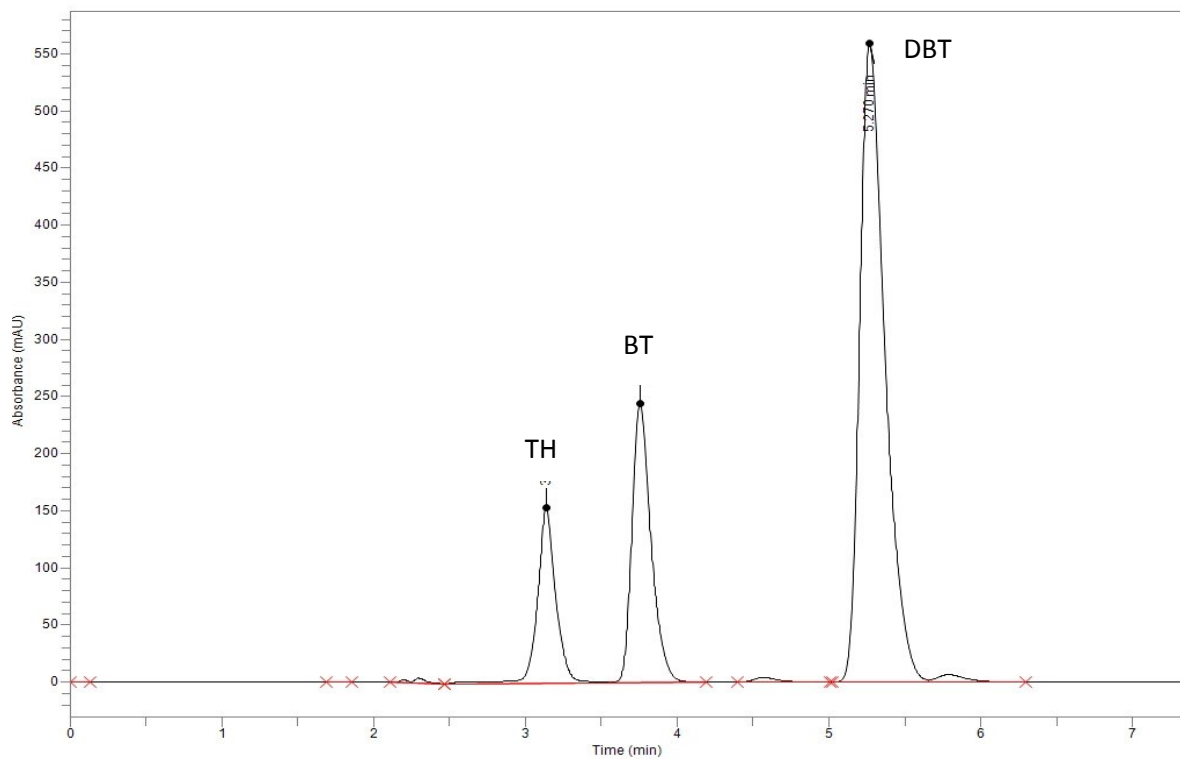

**Figure : HPLC of model fuel after adsorption by fly ash**

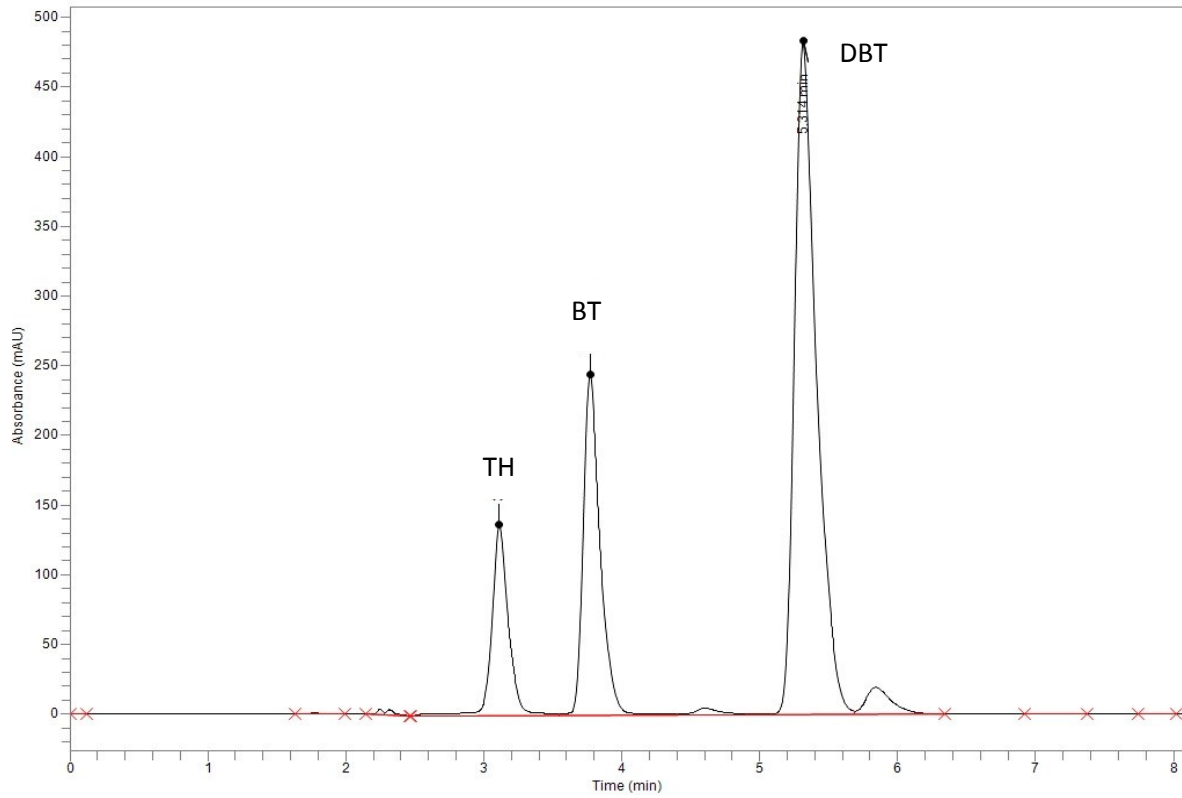

**Figure : HPLC of model fuel after adsorption by laterite soil**

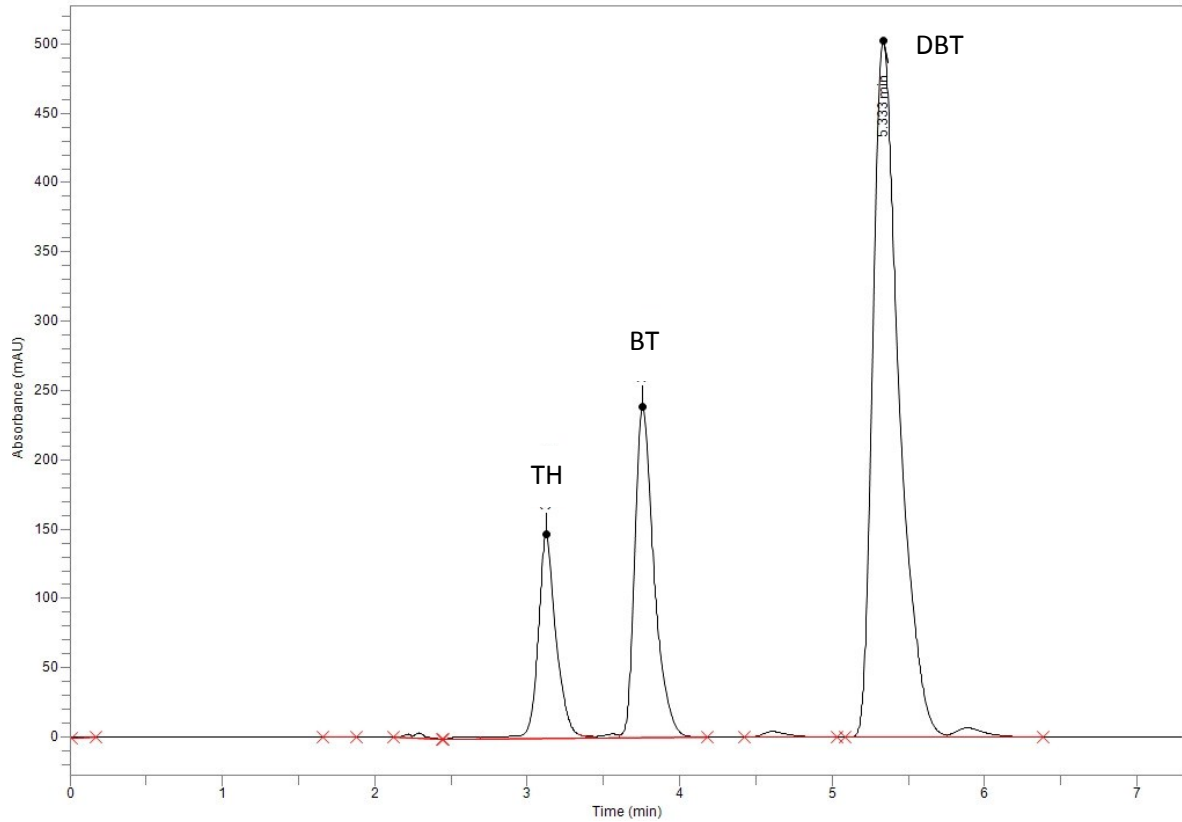

**Figure : HPLC of model fuel after adsorption by zeolite**

**Table: HPLC Instrumental analysis of peak area**

---

| Sulfur Compound   | Feed    | Coal    | Bentonite | Fly ash | Laterite soil | Zeolite |
|-------------------|---------|---------|-----------|---------|---------------|---------|
| Thiophenol        | 2779059 | 910974  | 853962    | 1308857 | 1149192       | 1221537 |
| Benzothiophene    | 3975885 | 1368102 | 1569404   | 2111263 | 2086542       | 2071761 |
| Di-benzothiophene | 9431592 | 3678691 | 3873302   | 6441873 | 5422230       | 5986014 |

---

**Table : Efficiency of adsorbents on real fuel**

---

| Name of adsorbent | Sulfur removal in Gasoline<br>(%) | Sulfur removal in LGO<br>(%) |
|-------------------|-----------------------------------|------------------------------|
| Coal Dust         | 82                                | 36                           |
| Bentonite powder  | 80                                | 35                           |
| Fly ash           | 79                                | 34                           |
| Laterite soil     | 75                                | 32.6                         |
| Zeolite           | 70                                | 28.9                         |

---

**Table :Property of straight run gasoline fuel before and after adsorption**

| Property                      | Before adsorption | After Adsorption |           |         |          |
|-------------------------------|-------------------|------------------|-----------|---------|----------|
|                               |                   | Coal             | Bentonite | Fly ash | Laterite |
| ASTM Distillation             |                   |                  |           |         |          |
| IBP( <sup>0</sup> C)          | 102               | 101              | 102       | 103     | 102      |
| FBP( <sup>0</sup> C)          | 143               | 140              | 141       | 142     | 144      |
| Specific Gravity              | 0.75              | 0.749            | 0.748     | 0.749   | 0.748    |
| API                           | 57.16             | 57.41            | 57.67     | 57.41   | 57.67    |
| RVP (psi)                     | 1                 | 1                | 1         | 1       | 1        |
| Flash Point ( <sup>0</sup> C) | 62                | 65               | 64        | 63      | 61       |
| Fire Point ( <sup>0</sup> C)  | 68                | 70               | 69        | 68      | 68       |
| Gum Content (mg/ml)           | 0.2738            | 0.272            | 0.273     | 0.2725  | 0.2735   |
| Oxygen Content (wt %)         | 1.6               | 1.4              | 1.45      | 1.5     | 1.51     |

\*API:- American Petroleum Institute

\*\*IBP & FBP:- Initial & Final boiling point

\*\*\*RVP:- Reid Vapour pressure

**Table : Property of light gas oil before and after adsorption**

| Property                      | Before adsorption | After Adsorption |           |         |          |
|-------------------------------|-------------------|------------------|-----------|---------|----------|
|                               |                   | Coal             | Bentonite | Fly ash | Laterite |
| ASTM Distillation             |                   |                  |           |         |          |
| IBP( <sup>0</sup> C)          | 170               | 168              | 169       | 168     | 167      |
| FBP( <sup>0</sup> C)          | 336               | 332              | 331       | 334     | 335      |
| Specific Gravity              | 0.843             | 0.841            | 0.842     | 0.841   | 0.842    |
| API                           | 36.35             | 36.75            | 36.55     | 36.75   | 36.55    |
| Viscosity (CS)                | 6.19              | 5.9              | 6.0       | 6.1     | 5.98     |
| Cloud Point ( <sup>0</sup> C) | 15                | 12               | 13        | 14      | 12       |
| Pour Point ( <sup>0</sup> C)  | -15               | -12              | -13       | -13     | -14      |
| Cetane No                     | 55.11             | 56.08            | 56        | 55.57   | 55.86    |

\*API:- American Petroleum Institute

\*\*IBP & FBP:- Initial & Final boiling point

\*\*\* CS:- Centistoke

**Table. Efficiency of adsorbents on nitrogen compound removal from real fuel**

---

| Name of adsorbent | Nitrogen removal in Gasoline<br>(%) | Nitrogen removal in Diesel<br>(%) |
|-------------------|-------------------------------------|-----------------------------------|
| Coal Dust         | 53                                  | 40                                |
| Bentonite powder  | 43                                  | 35                                |
| Fly ash           | 24                                  | 30                                |
| Laterite soil     | 18                                  | 25                                |
| Zeolite           | 14                                  | 20                                |

---

## Reference

- [1] D. Nag, P. Biswas, V. K. Chandaliya and P. K. Banerjee, *International Journal of Coal Preparation and Utilization*, 2011, 31(1), 1-8.
- [2] M. Balachandran, *American Journal of Analytical Chemistry*, 2014, 5, 367-72
- [3] B.H. Stuart, *Infrared Spectroscopy: Fundamental and Application*, 2004, 71-93
- [4] M.H. Ashtiani, *Part. Part. Syst. Charact.*, 2011, 28, 71–6
- [5] F.G. Alabarse, R.V. Conceicao, N.M. Balzaretto, F. Schenato and A.M. Xavier, *Applied Clay Science*, 2011, 51, 202–08
- [6] O. Celik, E. Damc and S. Piskin, *Indian Journal of Engineering & Materials Sciences*, 2008, 15, 433-40.
- [7] S. Katara, S. Kabra, A. Sharma, R. Hada and Ashu Rani, *International Research Journal of Pure & Applied Chemistry*, 2013, 3(4), 299-307
- [8] R. Shawabkeh, M.J. Khan, A.A.A. Juhani, H.I.A.A.Wahhab and I.A. Hussein, 3<sup>rd</sup> International conference on industrial and hazardous waste management, 2012, 1-8
- [9] D. Jain, R. Hada and A. Rani, *Journal of catalysts*, <http://dx.doi.org/10.1155/2013/723957>
- [10] V.K. Rathore, D.K. Dohare and P. Mondal, *Journal of Environmental Chemical Engineering*, 2016, 4, 2417–30
- [11] S. Hashemian, S.H. Hosseini, H. Salehifar and K. Salari, *American Journal of Analytical Chemistry*, 2013, 4, 123-6.
- [12] V. Balakrishnan, S. Arivoli, A.S. Begum and A.J. Ahamed, *J. Chem. Pharm. Res.*, 2010, 2(6),176-90.
- [13] A. Ravikumar, S.M.M.N. Khan, *Iranica Journal of Energy and Environment*, 2015, 6(4), 316-22.
